1 Isolation and characterization of the new *Streptomyces* phages Kamino, Geonosis, Abafar and  
2 Scarif infecting a broad range of host species

3

4 Bente Rackow<sup>1</sup>, Clara Rolland<sup>2</sup>, Isabelle Mohnen<sup>1</sup>, Johannes Wittmann<sup>2</sup>, Mathias Müsken<sup>3</sup>, Jörg  
5 Overmann<sup>2</sup>, and Julia Frunzke<sup>1\*</sup>

6 <sup>1</sup>Institute of Bio- and Geosciences, Forschungszentrum Jülich, Germany

7 <sup>2</sup>Leibniz Institute DSMZ—German Collection of Microorganisms and Cell Cultures,  
8 Braunschweig, Germany

9 <sup>3</sup>Central Facility for Microscopy, Helmholtz Centre for Infection Research, Braunschweig,  
10 Germany

11

12 \*Corresponding author:

13 Julia Frunzke; Email: [j.frunzke@fz-juelich.de](mailto:j.frunzke@fz-juelich.de); Phone: +49 2461 615430

14

15 **Abstract**

16 *Streptomyces*, a multifaceted genus of soil-dwelling bacteria within the phylum Actinobacteria,  
17 features intricate phage-host interactions shaped by its complex life cycle and the synthesis of a  
18 diverse array of specialized metabolites. Here, we describe the isolation and characterization of four  
19 novel *Streptomyces* phages infecting a variety of different host species. While phage Kamino, isolated  
20 on *Streptomyces kasugaensis*, is predicted to be temperate and encodes a serine integrase in its  
21 genome, phages Geonosis (isolated on *S. griseus*) and phages Abafar and Scarif, isolated on *S.*  
22 *albidoflavus*, are virulent phages. Phages Kamino and Geonosis were shown to amplify well in liquid  
23 culture leading to a pronounced culture collapse already at low titres. Determination of the host range  
24 by testing >40 different *Streptomyces* species identified phages Kamino, Abafar and Scarif as broad  
25 host range phages, with Kamino showing productive infections on 15 different species. Isolated  
26 phages were further tested regarding their sensitivity to antiphage molecules. Here, the strongest  
27 effects were observed for the DNA-intercalating molecule daunorubicin. Overall, the phages described

28 in this study expand the publicly available portfolio of phages infecting *Streptomyces* and will be  
29 instrumental for advancing the mechanistic understanding of the intricate antiviral strategies  
30 employed by these multicellular bacteria.

31

## 32 Introduction

33 *Streptomyces*, a genus of soil-dwelling multicellular Gram-positive bacteria belonging to the phylum  
34 *Actinomycetota*, stands out for its extensive array of biosynthetic gene clusters. These clusters encode  
35 a wide range of specialized metabolites exhibiting diverse biological activities, such as antibacterial,  
36 antifungal, anticancer, and even antiviral properties. Today, up to two-thirds of all nature-based  
37 antibiotics used in the clinics are produced by *Streptomyces* spp<sup>1-3</sup>. Furthermore, the intricate life  
38 cycle of *Streptomyces* positions it as a model for the study of multicellular development in bacteria<sup>4</sup>.  
39 Microbial interaction was shown to be a prominent trigger of secondary metabolite production and  
40 cellular development. Co-cultivations of microorganisms therefore represent a promising approach  
41 for the discovery of novel antibiotics otherwise not produced under laboratory conditions<sup>5</sup>. In recent  
42 years, also the interaction of *Streptomyces* with their most abundant predator in the environment –  
43 bacteriophages (or phages for short) – increasingly gained attention<sup>6,7</sup>.

44 Phage research in previous decades focused on phages for tool development employing phages like  
45 phiC31 or R4<sup>8-10</sup>. Genetic tools such as restriction enzymes and integrative plasmids have been  
46 constructed and are still valuable tools used in *Streptomyces* genetics<sup>11,12</sup>. In recent years, however,  
47 the focus of actinobacteriophage research has shifted from tool design to phage-host interaction, in  
48 particular to the elucidation of novel antiviral defence mechanisms<sup>13</sup>. Remarkably, it was shown that  
49 secondary metabolites produced by *Streptomyces*, belonging to the classes of anthracyclines and  
50 aminoglycosides, inhibit infection by a broad range of phages<sup>14,15</sup>. Furthermore, cellular development  
51 was shown to play a key role in the emergence of transient resistance to phage infection. This was  
52 shown for the development of transiently resistant mycelium at the infection interface on plates<sup>16</sup> as  
53 well as for the formation of S-forms lacking the cell wall, which occurred during infections under  
54 osmoprotective conditions<sup>17</sup>.

55 For the discovery and mechanistic understanding of novel defense strategies a diverse set of phages  
56 is needed incentivising the isolation and characterization of new phages. Using different *Streptomyces*  
57 species as isolation host, several new phages have been isolated and described in recent years<sup>18-20</sup>.  
58 These studies show that the common notion of a narrow host range and specific infection of phages  
59 does not necessarily apply to *Streptomyces* phages, as several actinophages have been described to  
60 have a broader host range and to productively infect several species of the genus<sup>20,21</sup>. However, in  
61 most studies only a small number of different host species has been tested delimitating the  
62 information regarding host range.

63 In this study, we isolated and characterized four new phages infecting *Streptomyces*. Testing a  
64 collection of over 40 distinct *Streptomyces* strains, we observed that the phages Kamino, Abafar, and

65 Scarif exhibited the ability to infect a wide array of *Streptomyces* species. This characteristic  
66 emphasizes their suitability for comparative studies on phage defense mechanisms across various host  
67 species. All four phages isolated in this study were sequenced and characterized regarding their  
68 infection dynamics and their sensitivity to known antiphage compounds.

69

## 70 **Materials and methods**

71 Bacterial strains and growth conditions

72 *Streptomyces albidoflavus* M145, *Streptomyces griseus* and *Streptomyces kasugaensis* were used as  
73 main host strains in this study. Bacterial cultures were started from a spore stock, stored at – 20°C in  
74 20 % glycerol. Spores were inoculated into fresh liquid Glucose Yeast Malt extract (GYM) medium for  
75 *S. griseus* and *S. kasugaensis* or into Yeast extract Malt extract (YEME) medium for *S. albidoflavus*  
76 M145. In general, cultivation was carried out at 30 °C. Double agar overlays were performed on GYM  
77 agar for all species, were 4 ml 0.4 % agar and 20 ml 1.5 % agar was used for the top and bottom layer,  
78 respectively.

79 Phage isolation and propagation

80 Phages described in this study were isolated from soil samples taken in the Eifel region (Aachen,  
81 Germany) and Braunschweig, respectively. The soil samples were incubated with sodium chloride /  
82 magnesium- sulphate (SM) buffer (10 mM Tris-HCl pH 7.3, 100 mM NaCl, 10 mM MgSO<sub>4</sub>, 2 mM CaCl<sub>2</sub>)  
83 over night at 4 °C on a shaking plate, to resolve phages from soil particles<sup>18</sup>. The samples were then  
84 centrifuged for 30 min at 5000 x g to separate the supernatant from soil particles. The supernatant  
85 was subsequently filtered through a 0.22 µm pore size membrane filter, to remove remaining bacteria.  
86 The lysate was furthermore enriched on the host bacteria described above, to enrich potential phages  
87 overnight. After overnight incubation serial dilutions were spotted on a bacterial lawn propagated by  
88 mixing overnight cultures of the host strains with 4 ml top agar to a final OD<sub>450</sub>= 0.4. Plaques were  
89 visualized after incubation over night at 30 °C.

90 Pure phages were obtained by restreaking single plaques twice on a double agar overlay. Amplification  
91 of phages for high titre stocks was performed by mixing 100 µl phage sample with the top agar of a  
92 double agar overlay to obtain confluent lysis of the bacterial lawn. After overnight incubation at 30 °C,  
93 the phages were resolved by adding 5 ml SM buffer to the plates and shaking the agar plates for 1-2  
94 hours at room temperature at 40 rpm. The SM buffer was then collected from the plates, centrifuged  
95 and subsequently filtered through a 0.22 µm membrane filter to separate remaining bacteria from the  
96 phage lysate. The high titre lysate was mixed with 10 % (v/v) sterile glycerol and stored at either - 80 °C

97 for long-term storage or 4 °C for further experiments. The phage titre of the lysate was determined by  
98 spotting 2 µl of a serial dilution up to 10<sup>-8</sup> onto a double agar overlay with the top agar containing the  
99 host bacterium to an OD<sub>450</sub> = 0.4. After overnight incubation at 30 °C, the highest dilution with visible  
100 single plaques was counted and the titre in plaque forming units (PFU) per ml was calculated.

#### 101 Electron microscopy

102 For transmission electron microscopy (TEM) 5 µl of pure high titre phage lysate were dropped on a  
103 glow discharged (15mA, 30 s) carbon-coated copper grid (CF300-CU, carbon film 300 mesh copper).  
104 The phage containing grid was stained with 2 % (w/v) uranyl acetate for 5 minutes and washed twice  
105 in ddH<sub>2</sub>O. Dried samples of Kamino and Geonosis were analysed with a TEM Talos L120C (Thermo  
106 Scientific, Dreieich, Germany) at an acceleration of 120 kV. Abafar and Scarif samples were examined  
107 in a Zeiss EM 910 or Zeiss Libra120 Plus transmission electron microscope (Carl Zeiss, Oberkochen,  
108 Germany) at an acceleration voltage of 80 kV/120 kV at calibrated magnifications using 300 mesh  
109 copper grids and a mica-floated carbon film enabling attachment of phages.

#### 110 Infection dynamics

111 Infection experiments in liquid cultures were performed as described in Hardy et al. (2020). Cultivation  
112 was performed in the BioLector micro cultivation system of m2plabs (Aachen, Germany) as biological  
113 triplicates in 48-well flower plates (m2plabs) at 30 °C with a shaking frequency of 1200 rpm.  
114 Backscattered light intensity was measured every 15 minutes (filter module:  $e_{excitation}/e_{emission}$ , 620 nm/  
115 620 nm; gain 25) and supernatant samples were taken every 2 hours to assess the infection dynamics  
116 and amplification rate. Infection took place in 1 ml YEME or GYM medium with *S. albidoflavus* M145,  
117 *S. griseus* and *S. kasugaensis* with an initial OD<sub>450</sub> of 0.15. Phages were directly added to the cells with  
118 initial titres from 10<sup>2</sup> to 10<sup>7</sup> PFU/ml. The sampled supernatant was centrifuged to separate phages  
119 from cell remnants and subsequently diluted in a serial dilution of 10<sup>-1</sup> to 10<sup>-8</sup>. The dilutions were  
120 spotted on a GYM double agar overlay containing the respective host bacteria in the top agar layer  
121 with an OD<sub>450</sub> = 0.4 to determine the phage titre over the course of the infection.

#### 122 Plaque development

123 The plaque morphology of the phages Abafar, Geonosis, Kamino and Scarif were observed on double  
124 agar overlay plates with a titre of 10<sup>2</sup> to 10<sup>3</sup> PFU/ml of each phage and an OD<sub>450</sub> = 0.4 of the respective  
125 host bacterium in the top agar. The plaque assay plates were incubated at 30 °C for 72 hours in total  
126 and images of single plaques were taken using a Nikon SMZ18 stereomicroscope with NIS-Elements  
127 AR 5.3 software after 24 h, 48 h and 72 h.

128 Phage host range assay

129 Host range determination of the four phages was performed with classical spot assays as described in  
130 the section “Phage isolation and propagation”. Different *Streptomyces* species (see Table S1 for  
131 productive infections and Table S2 for all tested strains) were used as bacterial lawn to test the  
132 infectivity of the respective phages. In this study, we discriminated between the simple clearance of  
133 the bacterial lawn by the phages and truly productive infections, where single plaques of the phages  
134 could be observed on the bacterial lawn. For all productive infections the efficiency of plating (EOP)  
135 was calculated by dividing the counted plaques on the tested bacterial host by the counted plaques  
136 on the “original” host, which was used for isolation.

137 Sensitivity to antiphage molecules

138 All phages were tested for their sensitivity towards small molecules, which are known to have anti-  
139 phage properties, such as aminoglycosides (apramycin and hygromycin), anthracyclines  
140 (daunorubicin) and the DNA-intercalating peptide antibiotic actinomycin D<sup>22-24</sup>. To determine whether  
141 the phages showed sensitivity towards the anti-phage compounds, spot assays were carried out as  
142 described before, however in this case rising concentrations of the antibiotics were added to the top  
143 and bottom layers of the double agar overlay. The spot assays were carried out in duplicates and all  
144 four phages were tested against daunorubicin and actinomycin D at the concentrations 0 µM, 1 µM,  
145 3 µM and 6 µM and against apramycin and hygromycin at the concentrations 0 µg/ml, 2.5 µg/ml, 25  
146 µg/ml and 50 µg/ml. The final titre was determined after 24-48 hours of incubation at 30 °C.

147 DNA isolation, genome assembly and annotation

148 Genomic DNA of the phages was isolated from 1 ml phage lysate with a high titre using the NORGEN  
149 BIOTEK CORP. Phage DNA isolation Kit (Thorhold, Canada). Isolation was carried out as described in  
150 the manual provided by the manufacturer, including all optional steps. To increase the concentration  
151 a two-step elution of the DNA in each 25 µl elution buffer was performed. DNA concentration was  
152 measured in a NanoPhotometer (P330, IMPLLEN, Germany). Whole genome sequencing using the  
153 Illumina NovaSeq platform with a read length of 2x 150 bp was performed by GENEWIZ Germany. The  
154 NEBNext Ultra II DNA Library Prep Kit was used to sequence the whole genome of phages on an  
155 Illumina MiSeq platform with paired reads of 15-150 base pairs in length. Initially, quality control  
156 checks for each pair of raw sequencing reads was performed using FASTQC v0.11.9  
157 (<http://www.bioinformatics.babraham.ac.uk/projects/fastqc/>). The adapter and low-quality reads  
158 were cleaned and trimmed from the sequencing data with the help of the fastp v0.23.2 program<sup>25</sup>.  
159 Next, the whole genome *de novo* assembly with the trimmed high-quality reads, was performed with  
160 the help of the Shovill pipeline v1.1.0 (<https://github.com/tseemann/shovill>) using the SPAdes

161 genome assembler v3.15.5<sup>26</sup>. Lastly, Pilon version 1.24<sup>27</sup> was used to improve, and curate the  
162 assembled genomes. Phage genomic terminal ends were identified using the PhageTerm<sup>28</sup> online  
163 galaxy platform.

164 All phage genomes were annotated with Prokka 1.8 using different databases (Markov model profile  
165 databases, including Pfam and TIGRFAMs). A search was performed using hmmscan from the HMMER  
166 3.1 package<sup>29</sup>. Sequences were also compared to the PHROG database<sup>30</sup>. Taxonomic classification  
167 was determined on the identity level to close related phages using NCBI BLASTn (NCBI, 2023) search  
168 and ordered according to the new virus taxonomy release (ICTV, 2023).

169

170

## 171 Results

172 Bacteriophage isolation and morphology

173 Four novel phages infecting different *Streptomyces* species were isolated from soil. Phage Kamino was  
174 isolated on *S. kasugaensis* as host, Geonosis on *S. griseus*, as well as Abafar and Scarif on *S. albidoflavus*  
175 (previously *S. coelicolor*) as isolation host. Phage Kamino forms small, turbid plaques (Figure 1A) with  
176 a plaque area of approximately 0.3 mm<sup>2</sup>; the plaque size is relatively constant over 48 hours of  
177 incubation (Figure 1B). Phage Geonosis forms round and clear plaques with sharp edges (Figure 1 A)  
178 and a plaque area of approximately 4 mm<sup>2</sup> after 24 h of incubation, which increases up to 38 mm<sup>2</sup> on  
179 average after 72 hours of incubation (Figure 1B). The *S. albidoflavus* infecting phages Abafar and Scarif  
180 show an overall similar plaque size as Geonosis with average plaque areas of 4.2 and 4.0 mm<sup>2</sup>,  
181 respectively, after 24 hours incubation. Abafar and Scarif also show an increase in plaque area over  
182 the course of 72 hours up to an average plaque area of 17 and 21 mm<sup>2</sup> (Figure 1B). Additionally,  
183 around the plaques of Abafar and Scarif enhanced production of actinorhodin was observed by the

184 formation of coloured halos around the plaques, which has been described in previous studies  
 185 reporting *S. albidoflavus*/*S. coelicolor* phages<sup>18,19</sup>(Figure 1A).

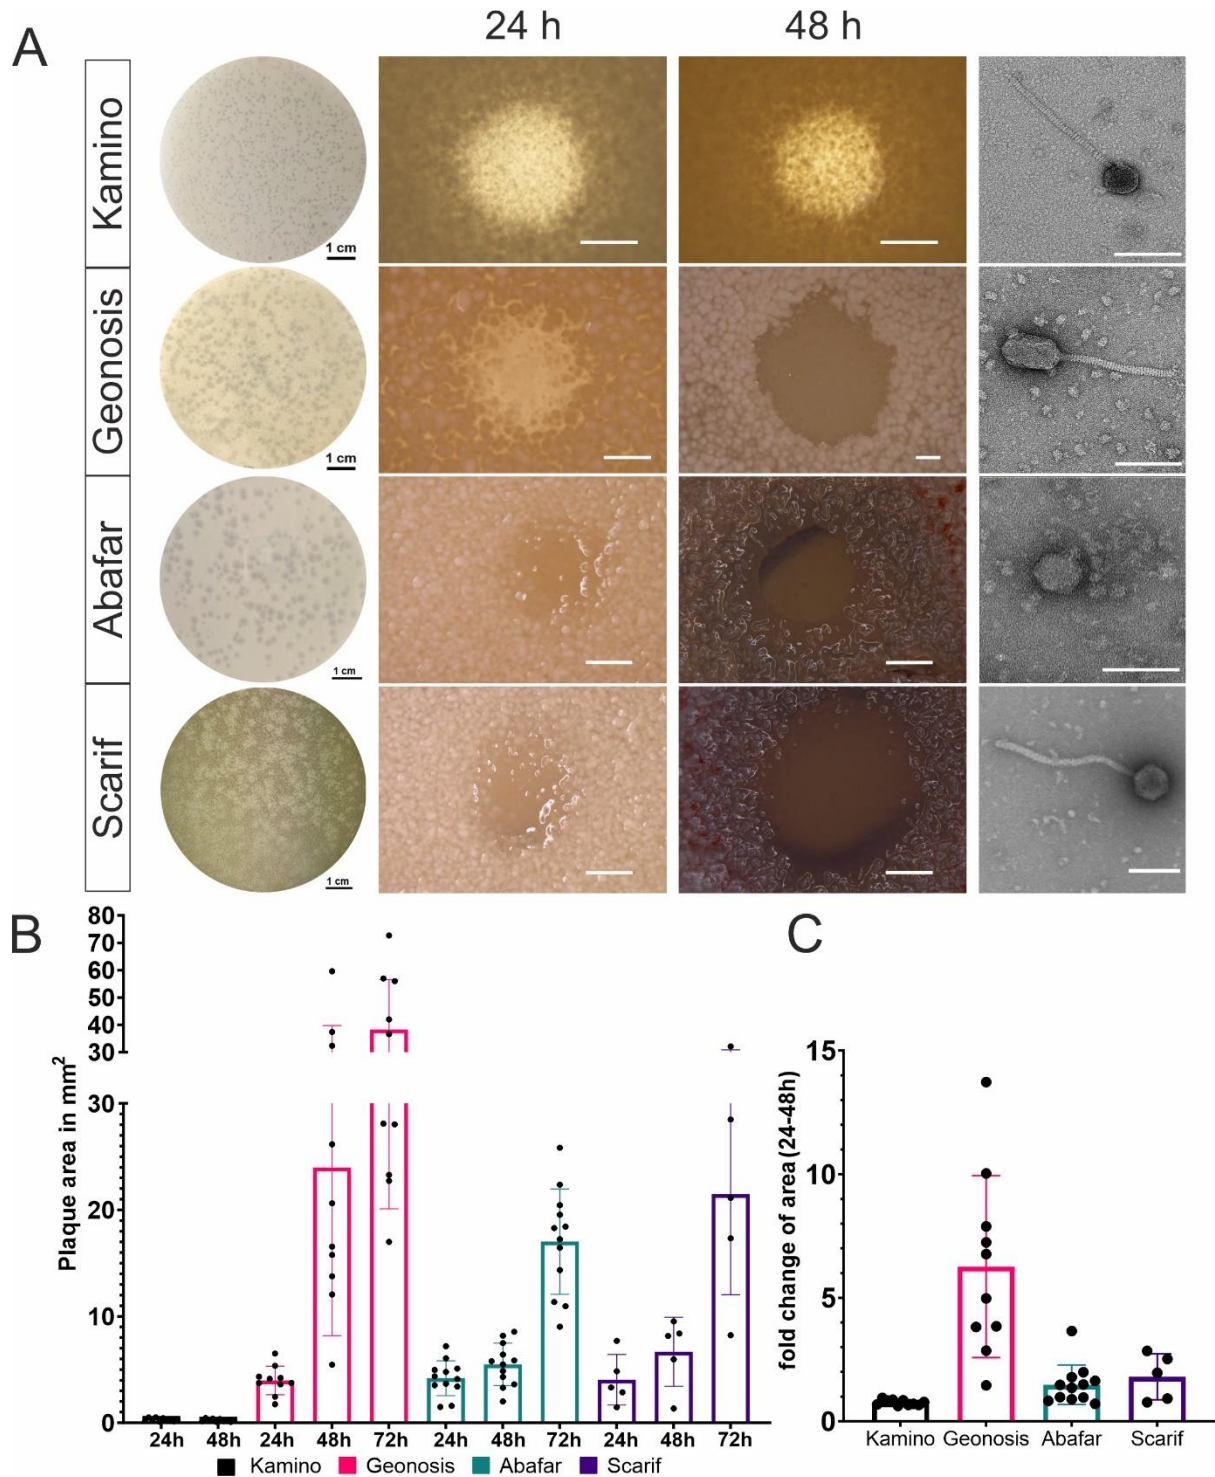

**Figure 1:** Morphological comparison of plaques and virions. A) Plaque and TEM images of the tested phages with an overview image of a plate with plaques, a plaque close up image 24 h and 48 h post infection and a TEM image of the virion from left to right respectively for the phages Kamino, Geonosis, Abafar and Scarif from top to bottom. The scale bar for the overview images is 1 cm in length, for plaque close ups the scale bar is 1000  $\mu\text{m}$  and for TEM images 100 nm. B) Comparison of the development of plaque area over time of 24-72 hours post infection with plaque area shown in  $\text{mm}^2$  for the phages Kamino (black,  $n = 10$ ) Geonosis (pink,  $n = 10$ ), Abafar (turquoise,  $n = 12$ ) and Scarif (purple,  $n = 5$ ). C) Fold change of plaque area between 24 h and 48 h post infection for all four phages in the same colour as graph B.



186 TEM imaging of the phage particles revealed that phages Kamino, Geonosis and Scarif belong to the  
187 morphotype siphovirus with an icosahedral capsid and a long, non-contractile tail, whereas phage  
188 Abafar features a podoviral morphotype, showing an icosahedral capsid with a very short tail (Figure  
189 1 A right column). Details on capsid and tail length are provided in Table 1.

190 Table 1: Morphological comparison of virions

| Phage                  | Tail length [nm] | Capsid length [nm] | Capsid diameter [nm] |
|------------------------|------------------|--------------------|----------------------|
| <b>Kamino (n=13)</b>   | 223.4 (+/- 7.1)  | 63.5 (+/- 2)       | 61.5 (+/- 1.4)       |
| <b>Geonosis (n=15)</b> | 176.5 (+/- 4.4)  | 88.6 (+/- 4.8)     | 53.8 (+/- 3.0)       |
| <b>Abafar (n=8)</b>    | 15.7 (+/- 1.5)   | 63 (+/- 3.1)       | 63 (+/- 1.9)         |
| <b>Scarif (n=5)</b>    | 270.2 (+/- 4.9)  | 69.8 (+/- 1.9)     | 67.4 (+/- 1.4)       |

191

192 Infection curves and host-range of bacteriophages

193 In order to assess phage infection dynamics, phage infections in liquid cultures on the original host  
194 strain were performed. As it is not suitable to perform one-step growth curves with *Streptomyces* spp.  
195 due to the multicellular development, the host strains were cultivated in microtiter plates in presence  
196 of different phage titres. Cell growth was monitored by backscatter measurements in 15 minutes  
197 intervals over the course of 24 hours and phage propagation was determined by taking samples from  
198 the culture supernatants every 2 hours to determine the titre of infectious phage particles at the  
199 respective time (Figure 2). Infections with phage Kamino and phage Geonosis lead to a complete  
200 culture collapse of their respective hosts, *S. kasugaensis* and *S. griseus*, with a starting titre as low as  
201  $10^2$  PFU/ml. The titre of Kamino and Geonosis increased steadily and reached final titres of  $10^6$  to  $10^9$   
202 PFU/ml for Kamino and  $10^{10}$  to  $10^{11}$  PFU/ml for Geonosis. On high titres ( $10^7$ ), however, little to no  
203 amplification was observed for phage Kamino. In contrast, phages Abafar and Scarif showed little to  
204 no growth defect on the bacterial culture, independent of the starting titre. Amplification of Abafar  
205 and Scarif could only be observed in spot assays, determining the phage titre over time. In case of  
206 phage Abafar, amplification in liquid was first observed for a starting titre of  $10^4$  PFU/ml and for phage  
207 Scarif at a starting titre of  $10^5$  PFU/ml, which indicates a probably lower burst size and decreased  
208 infectivity compared to Geonosis and Kamino. While the final titre determined for phages Kamino and  
209 Geonosis appeared independent from the starting titre, final titres significantly increased for Abafar  
210 and Scarif, when infection was initiated with higher starting titres. Under the specified conditions,

211 Abafar achieved final titres of  $10^6$  to  $10^{12}$  PFU/ml 24 h post infection while Scarif achieved titres  
 212 between  $10^4$  to  $10^6$  PFU/ml. Altogether, all four phages are able to propagate in liquid cultures to  
 213 different extends. Abafar and Scarif however reach higher titres when the lysate is prepared on plates.

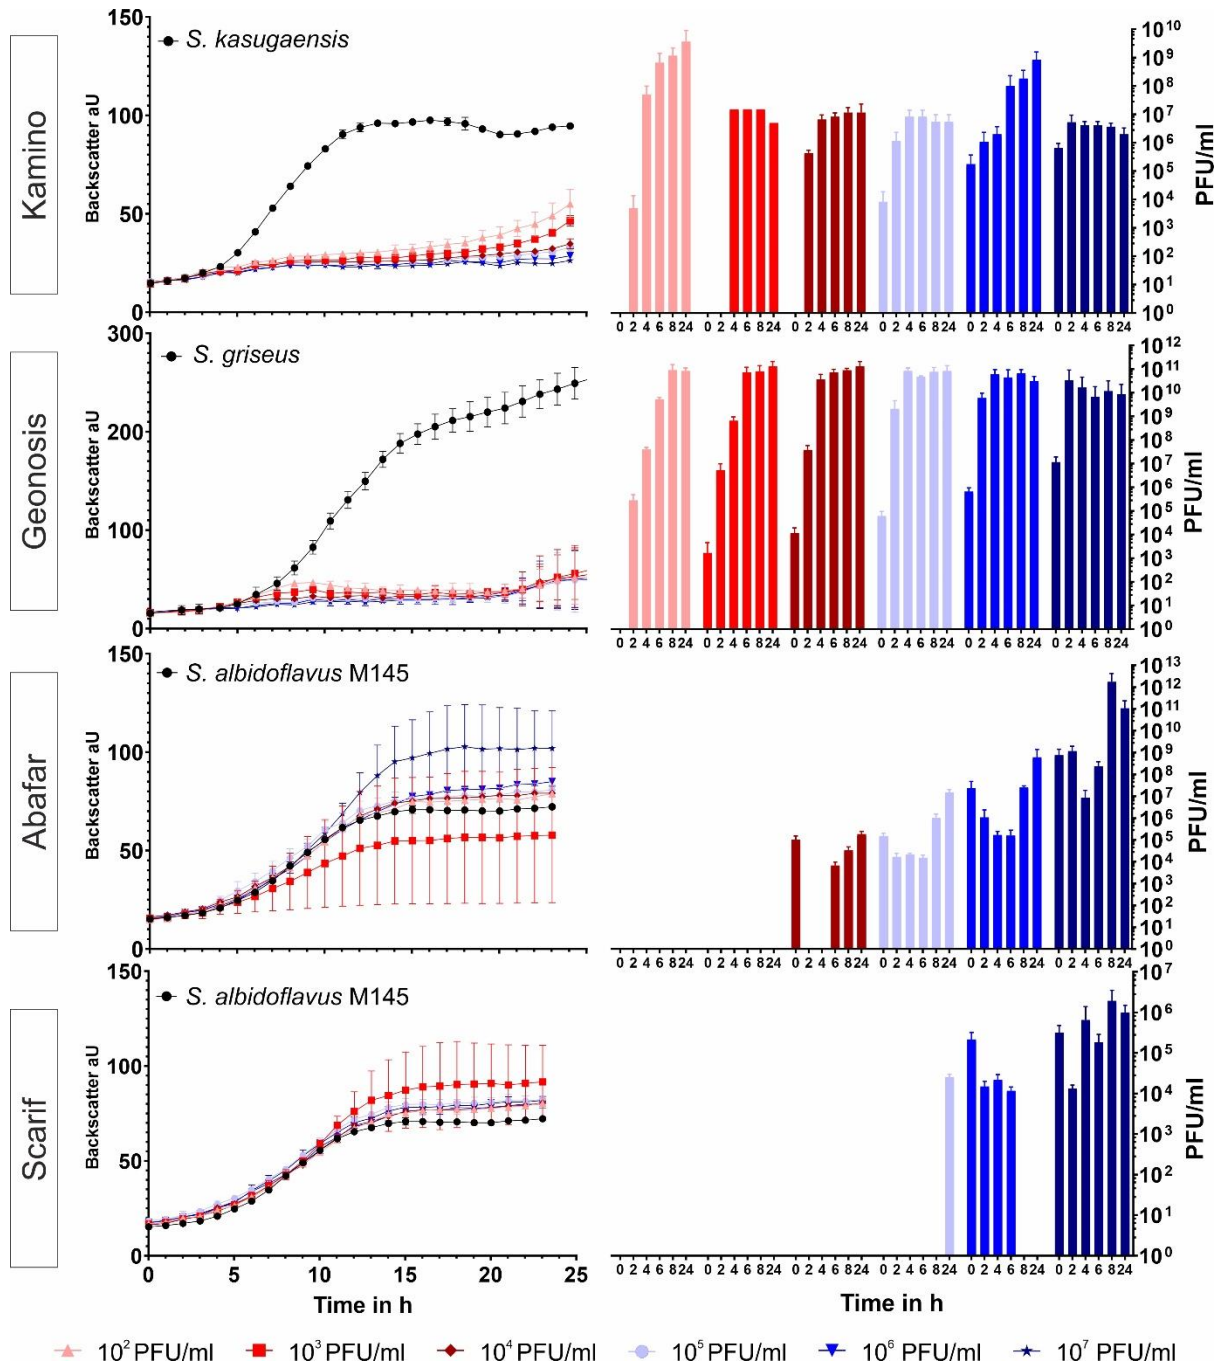

Figure 2: Infection curves of the four phages on their isolation host *S. kasugaensis* infected by Kamino, *S. griseus* infected by Geonosis and *S. albidoflavus* M145 infected by Abafar and Scarif. *S. kasugaensis* and *S. griseus* were inoculated to GYM medium and *S. albidoflavus* was grown in YEME medium. All strains were cultivated in microtiter plates and infected with increasing titres of the respective phages. In the left panel, the backscatter is plotted against time to visualize growth of the bacterial culture. In the right panel phage titre at different time points throughout the infection (2/4/6/8 and 24 h) are shown. The colours of the growth curves and the bar plots for the phage titre correlate to the same initial infection titre between  $10^2$  to  $10^7$  PFU/ml, the black curve indicates growth of the host bacterium in absence of phages. n= 3 independent biological replicates.

214 Host Range of phage isolates

215 One physiological trait that is important to consider when using or studying phages, is the range of  
216 bacterial hosts they are able to infect. In this study, we determined the host ranges of the novel phage  
217 isolates by spotting serial dilutions of the phages on lawns of >40 different *Streptomyces* species (Table  
218 S1). A distinction must be made between the simple lysis of bacteria and the ability to cause a  
219 productive infection, because only the latter leads to the formation of individual plaques (Figure 3B).  
220 From the four phages described in this study, phage Kamino has the broadest host range with lawn  
221 clearance on 22 *Streptomyces* spp. and productive infections on 15 different species among the 45  
222 species tested (Table S1, Figure 3B). The efficiency of plating (EOP) refers to the ratio of plaques  
223 formed on the host used for isolation compared to another host species. While phage Kamino is able  
224 to infect a wide variety of host strains, the EOP ranges from 0.002 % on *S. olivaceus* up to 5000 % on  
225 *S. afghaniensis* (Figure 3A). The phages Abafar and Scarif have the same range of productive infections  
226 with 7 different species but differ in their lawn clearance, where Abafar shows clearance on 12 species  
227 and Scarif only on 10 (Figure 3B). Phage Abafar displays an EOP lower than 100 % on the alternative  
228 hosts. Scarif however, reaches EOP's up to 8000 % on *S. afghaniensis* (Figure 3A). In contrast to these  
229 broad host-range phages, phage Geonosis is only able to infect two different *Streptomyces* species, its  
230 isolation host *S. griseus* and one additional host, *S. olivaceus* with an EOP of 0.15 %, which classifies  
231 Geonosis as a narrow host-range phage in this context (Figure 3A, B).

232

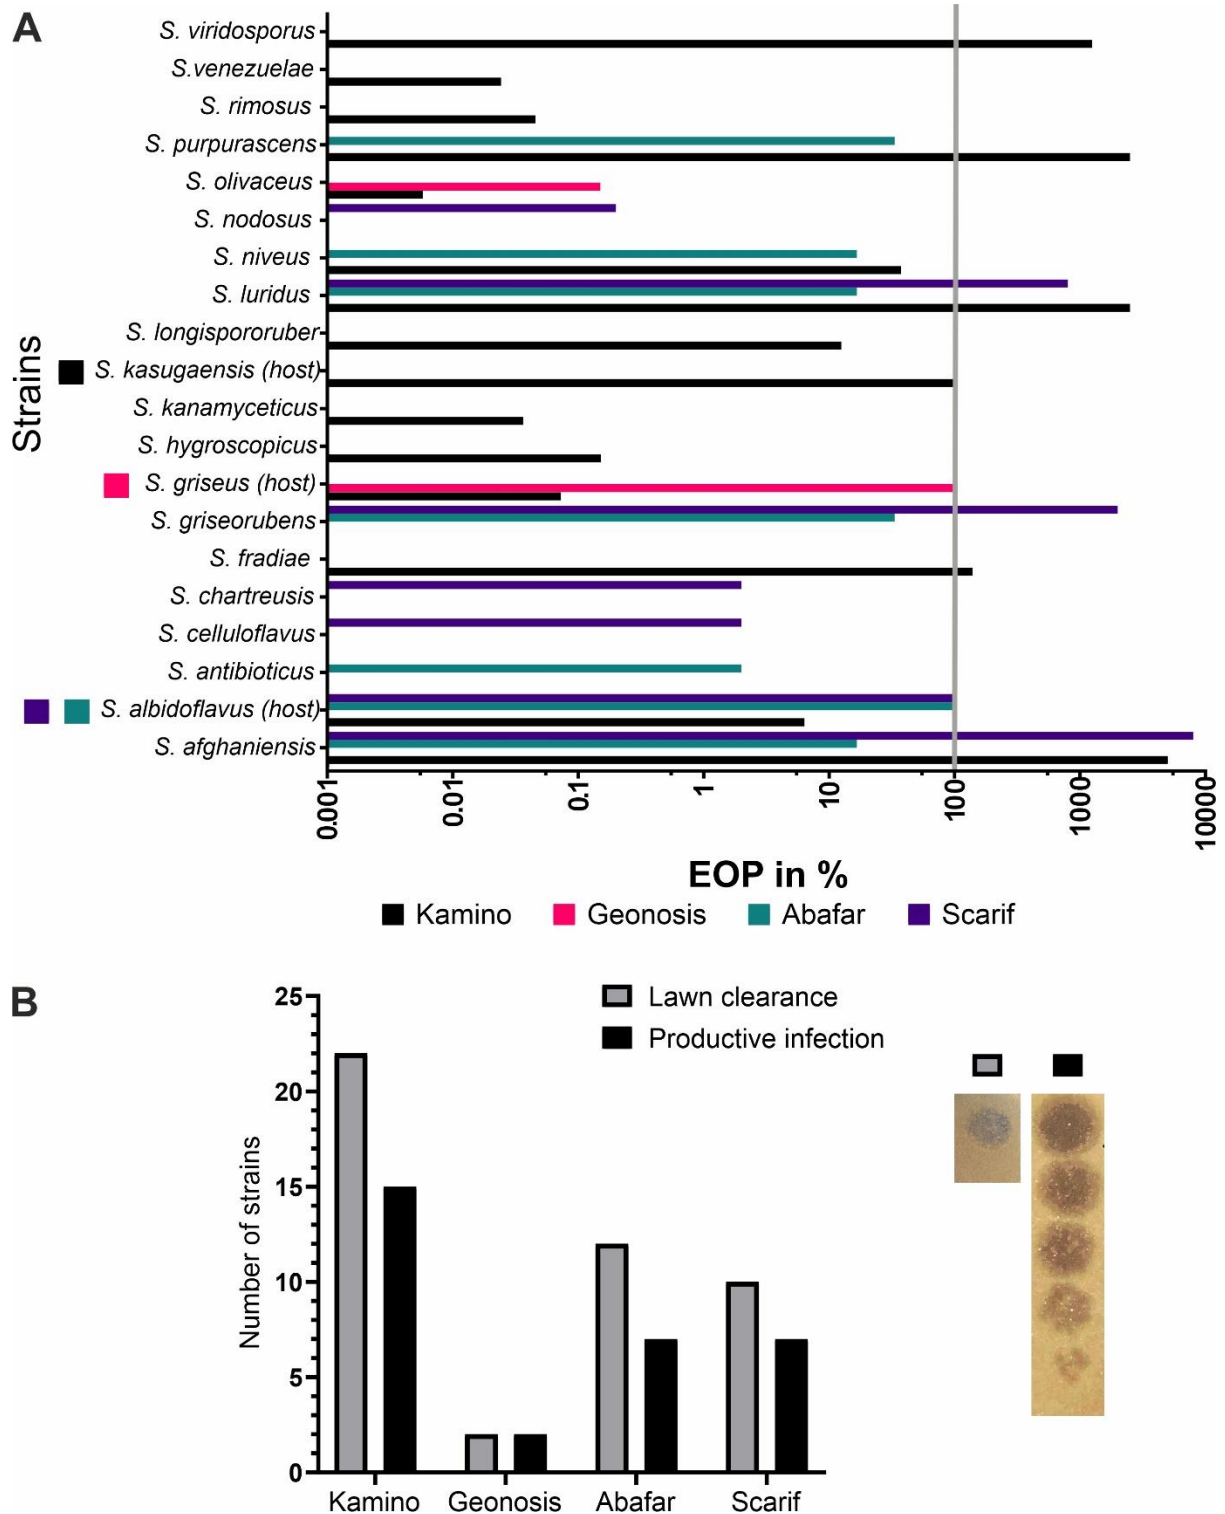

**Figure 3: Host range of the *Streptomyces* phages Kamino, Geonosis, Abafar and Scarif.** A) Efficiency of plating (EOP) in % to describe the host range of the four phages. On the Y-axis the tested *Streptomyces* strains are shown and on the X-axis the EOP in %. 100 % EOP (obtained on the isolation host) is marked with the grey line. B) Distribution of productive infection (black) versus lawn clearance (grey). On the right are exemplary images of lawn clearance and productive infection of phage Scarif on *S. albidoflavus*.

233

234

235 Comparison of genomes

236 Phage DNA of all four phages was isolated and sequenced using Illumina short read sequencing. Reads  
 237 were assembled and contigs were annotated using Prokka with implemented PHROG analysis (Table  
 238 2). Prediction of the phage lifestyle was performed with the machine-learning tool PhageAI <sup>31</sup> with  
 239 93.8 % confidence for a temperate lifestyle of Kamino and 93.5 %, 95.0 % and 73.6 % confidence for  
 240 Geonosis, Abafar and Scarif having a virulent lifestyle, respectively.

241 Table 2: Summary of genomic features of the four *Streptomyces* phages.

| Phage name      | Host                                        | Genome size (bp) | GC content (%) | Number of ORFs | CDS coding density (%) | Lifestyle prediction | Taxonomy                                                                                         |
|-----------------|---------------------------------------------|------------------|----------------|----------------|------------------------|----------------------|--------------------------------------------------------------------------------------------------|
| <b>Kamino</b>   | <i>Streptomyces kasugaensis</i> DSM 40819   | 49,381           | 65.4           | 91             | 92.5                   | temperate            | <i>Caudoviricetes</i><br><i>Arquatrovirinae</i><br><i>Camvirus</i> ,<br>"Camvirus kamino"        |
| <b>Geonosis</b> | <i>Streptomyces griseus</i> DSM 40236       | 57,039           | 68.9           | 69             | 90.2                   | virulent             | <i>Caudoviricetes</i> ,<br>"Woodruffvirus geonosis"                                              |
| <b>Abafar</b>   | <i>Streptomyces albidoflavus</i> DSM 112524 | 43,704           | 60.2           | 58             | 85.8                   | virulent             | <i>Caudoviricetes</i> ,<br><i>Beephvirinae</i> ,<br><i>Manuelvirus</i> ,<br>"Manuelvirus abafar" |
| <b>Scarif</b>   | <i>Streptomyces albidoflavus</i> DSM 112524 | 55,306           | 59.1           | 83             | 93.3                   | virulent             | <i>Caudoviricetes</i> ,<br>"Scarifvirus",<br>"Scarifvirus scarif"                                |

242 The genome of phage Abafar consists of 43,704 bp (GC% 60.2) with 58 predicted open reading frames  
 243 (ORF) and 15 genes for tRNAs (Figure 4). BLASTn analysis against NCBI database for viruses  
 244 (taxid: 10239) identified four closely related phages, classified members of the genus *Manuelvirus*. All  
 245 of them share a similar genome organization with functional gene clusters for packaging, and  
 246 structural proteins with an embedded gene for a putative endolysin between the genes encoding the  
 247 terminase large subunit and a portal protein (Figure S1). The cluster for replication contains conserved  
 248 genes coding for a primase, a helicase and different nucleases. No genes related to lysogeny were  
 249 identified, which is in line with the prediction of Abafar being virulent.

250

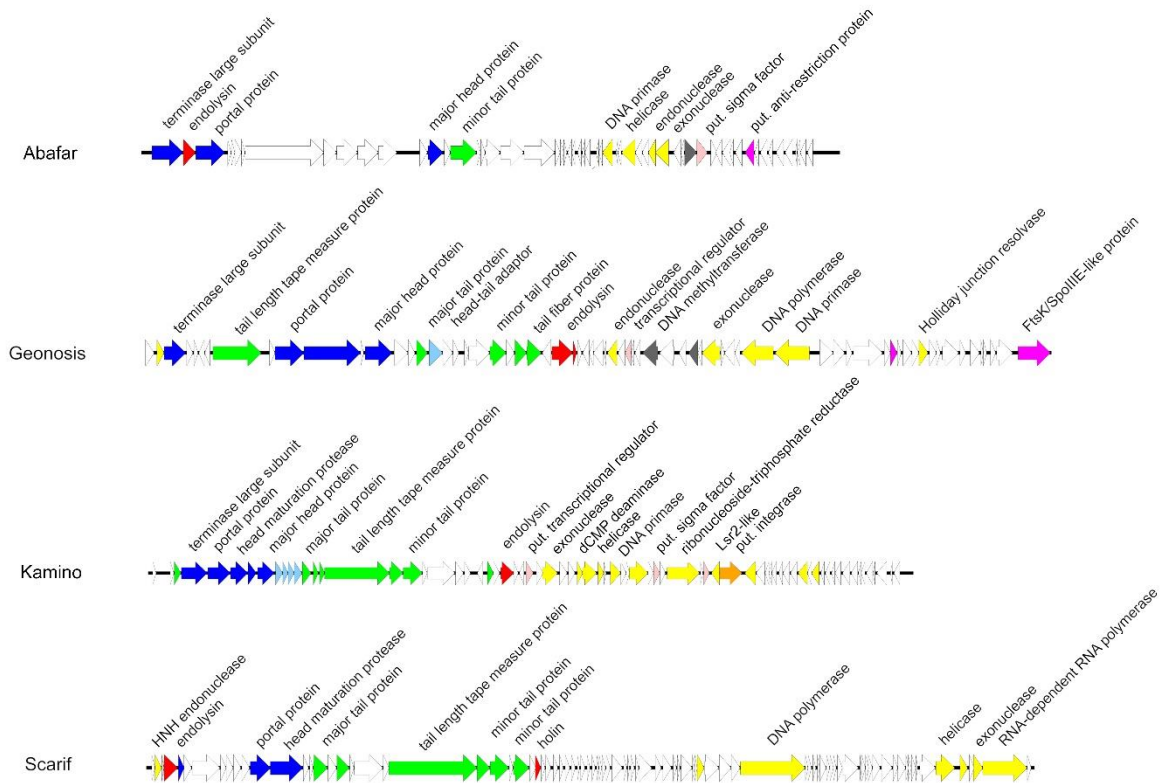

**Figure 4: Annotated genomes of phages Abafar, Geonosis, Kamino and Scarif.** Colouring is based on the PHROG colour code for functional clusters (Terzian et al., 2021) (orange: integration and excision; blue: head and packaging; purple: transcription; light blue: connector; green: tail; red: lysis; yellow: DNA, RNA and nucleotide metabolism; pink: moron, auxiliary metabolic gene and host takeover; dark grey: other).

251

252 Phage Geonosis has a genome size of 57,039 bp with an average GC content of 68.3 % comprising 69  
 253 ORFs but no tRNA genes (Figure 4). Comparison with other related Woodruffviruses like phage YDN12  
 254 <sup>32</sup> revealed a similar genome organization with gene clusters for packaging, structural head and tail  
 255 proteins, lysis comprising endolysin and holin genes and replication containing characteristic genes  
 256 for an endonuclease, a DNA methyltransferase, an exonuclease, a DNA polymerase and a DNA primase  
 257 (Figure S2). Furthermore, phage Geonosis also harbours genes for a putative Holliday junction  
 258 resolvase and an FtsK-like protein, respectively, that might also be used during replication.

259 Phage Kamino features a genome size of 49,381 bp with an average GC content of 65.4 % harbouring  
 260 91 ORFs, but no tRNA genes (Figure 4). BLASTn analysis identified related phages of the genus  
 261 *Camvirus* like Endor1 <sup>18</sup>, phiCAM <sup>33</sup>, Verabelle or Vanseggelen <sup>34</sup>. All of them share the same genome  
 262 organization with characteristic gene clusters for structure, replication and lysis (Figure S3). In contrast  
 263 to the other three isolated phages, phage Kamino harbors a gene for a serine integrase  
 264 (Kamino\_00049) and additional genes putatively involved in transcriptional regulation  
 265 (Kamino\_00029, Kamino\_00043 and Kamino\_00046) which is in line with the AI prediction of a  
 266 temperate lifestyle.

267 Genomic analysis of phage Scarif revealed a genome size of 55,306 bp (GC%: 59.1) with 89 predicted  
268 ORFs organized in characteristic clusters for replication including genes for a DNA polymerase, a  
269 helicase, an exonuclease or an RNA-dependent RNA polymerase and for head and tail structure  
270 comprising genes for a portal protein, minor and major tail proteins and a tail length tape measure  
271 protein (Figure 4). Given that this protein determines the tail length of the phage and assuming a tail  
272 length of 1.5 Å per amino acid residue, the calculated length (~274 nm) fits to the size measured via  
273 electron microscopy <sup>35</sup>. Generally, phage Scarif shares this genomic organization with phages  
274 belonging to the genus *Rimavirus* (Figure S4).

275 VIRIDIC analysis (Suppl. Table,<sup>36</sup>) identified phages Abafar, Geonosis and Kamino as putative new  
276 species within the genera *Manuelvirus*, *Woodruffvirus* and *Camvirus*, respectively, according to the  
277 ICTV rules with 95 % and 70 % nucleotide sequence identity over the length of the genome as species  
278 and genus demarcation criteria, respectively <sup>37,38</sup>. In contrast, based on this analysis, phage Scarif  
279 forms a new genus that we suggest to call “Scarifvirus”.

280

281 Sensitivity towards antiphage compounds

282 Recent studies have shown that some molecules produced by *Streptomyces* have pronounced impact  
 283 on phage infection<sup>22,24</sup>. To gain first insights, we tested the sensitivity of the novel phages against a  
 284 set of known antiphage compounds, including the aminoglycoside antibiotics apramycin and  
 285 hygromycin, as well as the DNA-intercalating molecules daunorubicin and actinomycin D (Figure  
 286 S5)<sup>14,15</sup>. Therefore, the three broad host-range phages Kamino, Abafar and Scarif were tested on *S.*  
 287 *albidoflavus* M145 as host, carrying resistance plasmids for apramycin (pJLK04) and hygromycin  
 288 (pJLK01). The DNA-intercalating molecules daunorubicin and actinomycin D were tested on wild type  
 289 strains. Geonosis was tested on its isolation host *S. griseus* as wild type on DNA-intercalating molecules  
 290 and on *S. griseus* pJLK04 on apramycin, since its narrow host range restricts the testing of sensitivity

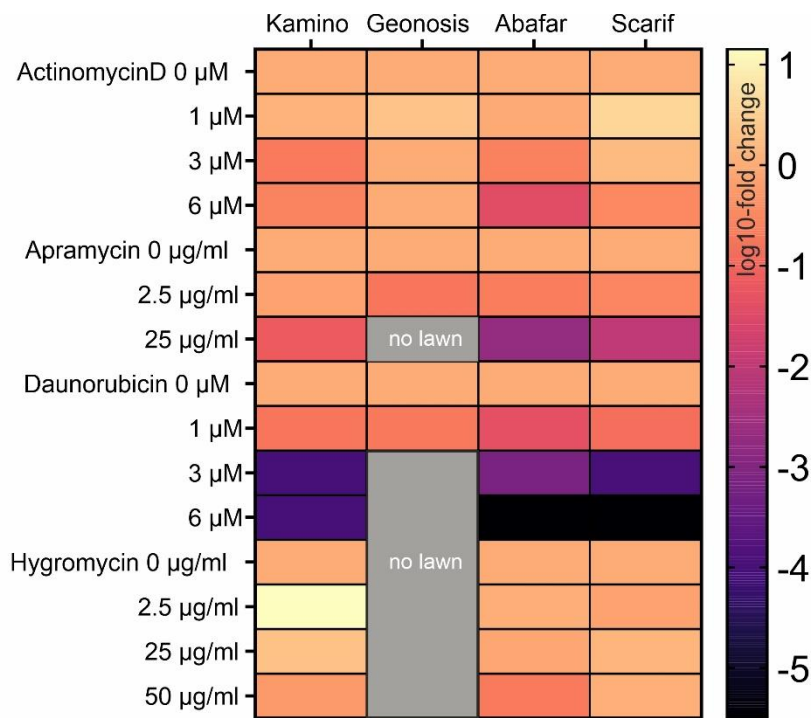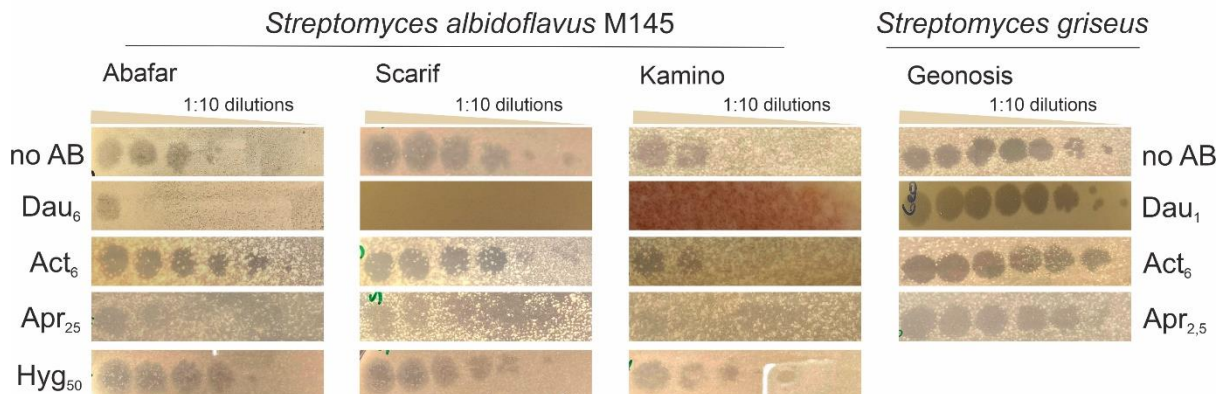

**Figure 5: Screening of antiphage small molecules.** On top is a heat map that represents the reaction of each phage (column) towards different concentrations of known anti-phage small molecule (row). The colour indicates the log<sub>10</sub>-fold change of phage titre. Below plaque images of the screening of each phage are shown exemplarily (n= 2 for each phage)



291 on other host organisms (Figure 5). For all four phages, the strongest inhibitory effect was observed  
292 when challenged with the DNA-intercalating molecule daunorubicin. At a concentration of 6  $\mu\text{M}$ ,  
293 daunorubicin decreased the phage titre of Kamino  $10^4$ -fold and for Abafar and Scarif  $10^5$  to  $10^6$ -fold.  
294 Since *S. griseus* did not form a bacterial lawn on concentrations higher than 1  $\mu\text{M}$ , we only observed  
295 a small decrease in phage titre of  $\sim 70\%$ . *S. albidoflavus* M145 also showed considerable growth  
296 defects on elevated daunorubicin concentrations. In contrast, the DNA intercalating peptide antibiotic  
297 actinomycin D showed only minor effects on the phage infections compared to daunorubicin. At the  
298 highest concentration of 6  $\mu\text{M}$  all phages infecting *S. albidoflavus* M145 showed a decrease in titre of  
299  $\sim 50$ - $70\%$ , whereas the titre of Geonosis remained stable. The broad host-range phages Kamino, Abafar  
300 and Scarif showed a decrease in titre of  $10^1$  to  $10^3$  on 25  $\mu\text{g/ml}$  apramycin, while Geonosis remained  
301 stable in titre at the highest concentration tested. The lowest impact on infection of the phages was  
302 exerted by hygromycin, which seemed to have no effect on plaque formation of Kamino and Scarif  
303 and only little effect on the plaque formation of Abafar, decreasing the titre by  $\sim 75\%$  at the highest  
304 concentration of 50  $\mu\text{g/ml}$ .

305

## 306 Discussion

307 In this study, we present the isolation and characterization of four novel *Streptomyces* phages. Phage  
308 Kamino was isolated on *S. kasugaensis*, Geonosis was isolated on *S. griseus* and Abafar and Scarif were  
309 isolated on *S. albidoflavus*. Phage Kamino is predicted to be a temperate phage, carrying a serine  
310 integrase on its genome, whereas Geonosis, Abafar and Scarif are predicted to be strictly virulent.  
311 Three of the four phages described in this study have a broad host range with productive infections  
312 on 7 to 15 different *Streptomyces* species (out of 45 different strains tested).

313 Of the phages reported in this study, Kamino and Geonosis amplify well in liquid cultures (Figure 2). In  
314 particular, Kamino showed highly efficient infection of *S. kasugaensis* already at very low starting titres  
315 ( $10^2$  PFU/ml). In contrast to this, Abafar and Scarif show little amplification in liquid infections and no  
316 effect on the growth of their host organism *S. albidoflavus* M145. This is, in fact, not an unusual feature  
317 of phages infecting *Streptomyces* and has been reported previously <sup>34,39</sup>.

318 When compared to the recently reported *Streptomyces* phages Vanseggelen and Verabelle, which also  
319 infect several different species <sup>34</sup> (Figure S4), two major differences were detected in the genome of  
320 phage Kamino <sup>40</sup>. First, the gene for the integrase (Kamino\_00049) shows no similarity at the  
321 nucleotide level to the integrase genes in Vanseggelen and Verabelle, secondly the gene annotated as  
322 a putative tail fibre in Verabelle and Vanseggelen, respectively, also reveals only weak similarities to  
323 its homolog in Kamino (Kamino\_00020). However, the differences in their tail fibres compared to their  
324 otherwise conserved genome structure might explain their different host range behaviour as those  
325 structures are major players in virus-host interactions <sup>40</sup>. Moreover, broad host range phages like  
326 Kamino, equipped with a serine integrase for a temperate lifestyle, can serve as powerful tools for  
327 genetic manipulation across various strains <sup>8,21</sup>. In this context, novel integrative plasmids could be  
328 engineered utilizing the attP site of Kamino, expanding the repertoire of genetically modifiable  
329 *Streptomyces* strains.

330 Little is known so far about the characteristic phage traits of different morphotypes in phages infecting  
331 actinobacteria <sup>41</sup>. In line with our findings, the majority of described *Streptomyces* phages belong to  
332 the morphotype of siphoviruses. Phage Abafar isolated in this study, however, might be a good  
333 example to study the differences in infection dynamics and adsorption of podoviruses. Genomic  
334 analysis of phage Abafar revealed that - in contrast to the three siphoviruses of this study - its genome  
335 contains 15 tRNA genes. Those phage-encoded tRNAs are considered to be used to evade host defense  
336 mechanisms that directly target tRNAs <sup>42,43</sup>. Furthermore, we detected a gene (Abafar\_00064) with an  
337 incomplete conserved domain that shows similarities to an ArdA-like anti-restriction protein. BLASTp

338 analysis of the predicted amino acid sequence identified homologous proteins only in other  
339 podoviruses infecting *Streptomyces* species.

340 Recent years have seen an unprecedented expansion of our understanding of the prokaryotic immune  
341 system with more than 100 new systems been identified <sup>44</sup>. It is a typical feature of immune systems  
342 that they confer protection against some, but certainly not against all types of viruses. This holds also  
343 true for antiphage molecules produced by *Streptomyces*, which were shown to affect phage infection  
344 to different extents <sup>14,15</sup>. In this study, we observed the strongest antiphage effects for the DNA  
345 intercalating agent daunorubicin which inhibited all four tested phages. In contrast, the DNA-  
346 intercalating peptide antibiotic actinomycin D displayed only minor effects. These variations may arise  
347 from differences in their intercalation properties and/or from differences in molecule uptake.  
348 Significant differences between different phages and hosts were also observed for aminoglycoside  
349 antibiotics where so far only minor effects were observed for phages infecting *S. albidoflavus* (*S.*  
350 *coelicolor*) <sup>14</sup>. For the phages described in this study, phage Abafar showed the highest sensitivity to  
351 all tested compounds, as a decrease in phage titre was observed for all tested molecules.

352 To further understand phage and host determinants conferring sensitivity to antiphage molecules the  
353 comparative analysis of a diverse set of phages is required. In fact, systematic phage collections proved  
354 highly valuable in assessing the efficacy of diverse defense systems against a wide spectrum of phages  
355 infecting a particular host or genus <sup>45</sup>. Broad host range phages further provide the opportunity to  
356 determine context dependency by comparing the effect of a given defense system/antiphage  
357 molecule across different host species.

358

359

360 **Author Contributions:** Conceptualization: B.R., C.R., J.W. J.F.; Data Curation, B.R., C.R.; Formal  
361 Analysis: B.R., C.R., I.M.; Funding acquisition: J.W., J.O., J.F.; Investigation: B.R., C.R., I.M.;  
362 Methodology: All; Project administration: J.W. and J.F.; Resources: J.W., J.O., J.F.; Supervision: J.W.,  
363 J.O., J.F.; Validation: All; Visualization: B.R., C.R., J.W. ; Writing—original draft: B.R., C.R., J.W., J.F.;  
364 Writing—review and editing: All. All authors have read and agreed to the published version of the  
365 manuscript.

366

367

368

369 **Funding:**

370 We thank the Deutsche Forschungsgemeinschaft (SPP 2330, project 464434020 and 465136285) for  
371 financial support.

372

373 **Acknowledgements**

374 We would like to thank Vikas Sharma for his help with phage genome analysis and Stephanie Held for  
375 her help and support.

376

377 **Conflicts of interest:** The authors declare no conflict of interest.

378

379

380

## 381 References

- 382 1 Hopwood, D. A. *Streptomyces in Nature and Medicine: The Antibiotic Makers*. 1 edn, 272  
383 (Oxford University Press, 2007).
- 384 2 Kieser, T., Bibb, M. J., Buttner, M. J., Charter, K. F. & Hopwood, D. A. *Practical Streptomyces*  
385 *Genetics*. (The John Innes Foundation, Norwich, UK 2000).
- 386 3 Bibb, Mervyn J. Understanding and manipulating antibiotic production in actinomycetes.  
387 *Biochemical Society Transactions* **41**, 1355-1364, doi:10.1042/bst20130214 (2013).
- 388 4 Zambri, M. P., Williams, M. A. & Elliot, M. A. How Streptomyces thrive: Advancing our  
389 understanding of classical development and uncovering new behaviors. *Advances in microbial*  
390 *physiology* **80**, 203-236, doi:10.1016/bs.ampbs.2022.01.004 (2022).
- 391 5 Netzker, T. *et al.* Microbial interactions trigger the production of antibiotics. *Curr. Opin.*  
392 *Microbiol.* **45**, 117-123, doi:10.1016/j.mib.2018.04.002 (2018).
- 393 6 Luthe, T., Kever, L., Thormann, K. & Frunzke, J. Bacterial multicellular behavior in antiviral  
394 defense. *Curr. Opin. Microbiol.* **74**, 102314, doi:10.1016/j.mib.2023.102314 (2023).
- 395 7 Shepherdson, E. M., Baglio, C. R. & Elliot, M. A. *Streptomyces* behavior and competition in the  
396 natural environment. *Curr. Opin. Microbiol.* **71**, 102257, doi:10.1016/j.mib.2022.102257  
397 (2023).
- 398 8 Smith, M. C. M., Burns, R. N., Wilson, S. E. & Gregory, M. A. The complete genome sequence  
399 of the Streptomyces temperate phage  $\phi$ C31: evolutionary relationships to other viruses.  
400 *Nucleic Acids Res* **27**, 2145-2155, doi:10.1093/nar/27.10.2145 (1999).
- 401 9 Smith, M. C. M. *et al.* Evolutionary Relationships among Actinophages and a Putative  
402 Adaptation for Growth in Streptomyces spp. *J Bacteriol* **195**, 4924-4935,  
403 doi:doi:10.1128/jb.00618-13 (2013).
- 404 10 Jensen, E. C. *et al.* Prevalence of Broad-Host-Range Lytic Bacteriophages of *Sphaerotilus*  
405 *natans*, *Escherichia coli*, and *Pseudomonas aeruginosa*. *Applied and Environmental*  
406 *Microbiology* **64**, 575-580, doi:doi:10.1128/AEM.64.2.575-580.1998 (1998).
- 407 11 Charter, K. F. & Carter, A. T. A New, Wide Host-range, Temperate Bacteriophage (R4) of  
408 Streptomyces and its Interaction with some Restriction-Modification Systems. *Microbiology*  
409 **115**, 431-442, doi:<https://doi.org/10.1099/00221287-115-2-431> (1979).
- 410 12 Lanning, S. & Williams, S. T. Methods for the Direct Isolation and Enumeration of Actinophages  
411 in Soil. *Microbiology* **128**, 2063-2071, doi:<https://doi.org/10.1099/00221287-128-9-2063>  
412 (1982).
- 413 13 Georjon, H., Tesson, F., Shomar, H. & Bernheim, A. Genomic characterization of the antiviral  
414 arsenal of Actinobacteria. *Microbiology (Reading)* **169**, doi:10.1099/mic.0.001374 (2023).
- 415 14 Kever, L. *et al.* Aminoglycoside Antibiotics Inhibit Phage Infection by Blocking an Early Step of  
416 the Infection Cycle. *mBio* **13**, e0078322, doi:10.1128/mbio.00783-22 (2022).
- 417 15 Kronheim, S. *et al.* A chemical defence against phage infection. *Nature* **564**, 283-286,  
418 doi:10.1038/s41586-018-0767-x (2018).
- 419 16 Luthe, T. *et al.* *Streptomyces* development is involved in the efficient containment of viral  
420 infections. *microLife* doi: **10.1093/femsml/uqad002** (2023).
- 421 17 Ongena, V. *et al.* Reversible bacteriophage resistance by shedding the bacterial cell wall.  
422 *Open biology* **12**, 210379, doi:10.1098/rsob.210379 (2022).
- 423 18 Hardy, A., Sharma, V., Kever, L. & Frunzke, J. Genome Sequence and Characterization of Five  
424 Bacteriophages Infecting *Streptomyces coelicolor* and *Streptomyces venezuelae*: Alderaan,  
425 Coruscant, Dagobah, Endor1 and Endor2. *Viruses* **12**, 1065 (2020).
- 426 19 Kronheim, S. *et al.* Complete genomes and comparative analyses of Streptomyces phages that  
427 influence secondary metabolism and sporulation. *Sci Rep* **13**, 9820, doi:10.1038/s41598-023-  
428 36938-z (2023).
- 429 20 Ongena, V. *et al.* Genome sequence and characterization of Streptomyces phage Pablito,  
430 representing a new species within the genus Janusvirus. doi:[https://doi.org/10.21203/rs.3.rs-  
431 1784137/v1](https://doi.org/10.21203/rs.3.rs-1784137/v1) (2022).

- 432 21 Montañó, E. T. *et al.* Isolation and characterization of Streptomyces bacteriophages and  
433 Streptomyces strains encoding biosynthetic arsenals. *PloS one* **17**, e0262354,  
434 doi:10.1371/journal.pone.0262354 (2022).
- 435 22 Kever, L. *et al.* Aminoglycoside Antibiotics Inhibit Phage Infection by Blocking an Early Step of  
436 the Infection Cycle. *mBio* **0**, e00783-00722, doi:doi:10.1128/mbio.00783-22 (2022).
- 437 23 Hardy, A., Kever, L. & Frunzke, J. Antiphage small molecules produced by bacteria – beyond  
438 protein-mediated defenses. *Trends in Microbiology* **31**, 92-106,  
439 doi:<https://doi.org/10.1016/j.tim.2022.08.001> (2023).
- 440 24 Kronheim, S. *et al.* A chemical defence against phage infection. *Nature* **564**, 283-286,  
441 doi:10.1038/s41586-018-0767-x (2018).
- 442 25 Chen, S., Zhou, Y., Chen, Y. & Gu, J. fastp: an ultra-fast all-in-one FASTQ preprocessor.  
443 *Bioinformatics* **34**, i884-i890, doi:10.1093/bioinformatics/bty560 (2018).
- 444 26 Bankevich, A. *et al.* SPAdes: a new genome assembly algorithm and its applications to single-  
445 cell sequencing. *Journal of computational biology : a journal of computational molecular cell*  
446 *biology* **19**, 455-477, doi:10.1089/cmb.2012.0021 (2012).
- 447 27 Walker, B. J. *et al.* Pilon: An Integrated Tool for Comprehensive Microbial Variant Detection  
448 and Genome Assembly Improvement. *PloS one* **9**, e112963,  
449 doi:10.1371/journal.pone.0112963 (2014).
- 450 28 Garneau, J. R., Depardieu, F., Fortier, L. C., Bikard, D. & Monot, M. PhageTerm: a tool for fast  
451 and accurate determination of phage termini and packaging mechanism using next-  
452 generation sequencing data. *Sci Rep* **7**, 8292, doi:10.1038/s41598-017-07910-5 (2017).
- 453 29 Seemann, T. Prokka: rapid prokaryotic genome annotation. *Bioinformatics* **30**, 2068-2069,  
454 doi:10.1093/bioinformatics/btu153 (2014).
- 455 30 Terzian, P. *et al.* PHROG: families of prokaryotic virus proteins clustered using remote  
456 homology. *NAR genomics and bioinformatics* **3**, lqab067, doi:10.1093/nargab/lqab067 (2021).
- 457 31 Tynecki, P. *et al.* PhageAI - Bacteriophage Life Cycle Recognition with Machine Learning and  
458 Natural Language Processing. *bioRxiv*, 2020.2007.2011.198606,  
459 doi:10.1101/2020.07.11.198606 (2020).
- 460 32 Donegan-Quick, R. *et al.* Genome Sequences of Five Streptomyces Bacteriophages Forming  
461 Cluster BG. *Genome announcements* **5**, doi:10.1128/genomeA.00502-17 (2017).
- 462 33 Monson, R. & Salmond, G. P. Genome sequence of a new Streptomyces coelicolor generalized  
463 transducing bacteriophage, ΦCAM. *Journal of virology* **86**, 13860, doi:10.1128/jvi.02681-12  
464 (2012).
- 465 34 Ongenae, V. *et al.* Genome sequence and characterization of Streptomyces phages  
466 Vanseggelen and Verabelle, representing two new species within the genus Camvirus. *Sci Rep*  
467 **13**, 20153, doi:10.1038/s41598-023-47634-3 (2023).
- 468 35 Katsura, I. & Hendrix, R. W. Length determination in bacteriophage lambda tails. *Cell* **39**, 691-  
469 698, doi:10.1016/0092-8674(84)90476-8 (1984).
- 470 36 Moraru, C., Varsani, A. & Kropinski, A. M. VIRIDIC-A Novel Tool to Calculate the Intergenomic  
471 Similarities of Prokaryote-Infecting Viruses. *Viruses* **12**, doi:10.3390/v12111268 (2020).
- 472 37 Krupovic, M. *et al.* Bacterial Viruses Subcommittee and Archaeal Viruses Subcommittee of the  
473 ICTV: update of taxonomy changes in 2021. *Archives of Virology* **166**, 3239-3244,  
474 doi:10.1007/s00705-021-05205-9 (2021).
- 475 38 Adriaenssens, E. & Brister, J. R. How to Name and Classify Your Phage: An Informal Guide.  
476 *Viruses* **9**, doi:10.3390/v9040070 (2017).
- 477 39 Hardy, A., Sharma, V., Kever, L. & Frunzke, J. Genome Sequence and Characterization of Five  
478 Bacteriophages Infecting Streptomyces Coelicolor and Streptomyces Venezuelae: Alderaan,  
479 Coruscant, Dagobah, Endor1 and Endor2. *Viruses* **12**, doi:10.3390/v12101065 (2020).
- 480 40 Taslem Mourosi, J. *et al.* Understanding Bacteriophage Tail Fiber Interaction with Host Surface  
481 Receptor: The Key "Blueprint" for Reprogramming Phage Host Range. *Int J Mol Sci* **23**,  
482 doi:10.3390/ijms232012146 (2022).

- 483 41 Podgorski, J. *et al.* Structures of Three Actinobacteriophage Capsids: Roles of Symmetry and  
484 Accessory Proteins. *Viruses* **12**, 294 (2020).
- 485 42 Burman, N. *et al.* Viral proteins activate PARIS-mediated tRNA degradation and viral tRNAs  
486 rescue infection. *bioRxiv*, doi:10.1101/2024.01.02.573894 (2024).
- 487 43 van den Berg, D. F., van der Steen, B. A., Costa, A. R. & Brouns, S. J. J. Phage tRNAs evade tRNA-  
488 targeting host defenses through anticodon loop mutations. *eLife* **12**, doi:10.7554/eLife.85183  
489 (2023).
- 490 44 Georjon, H. & Bernheim, A. The highly diverse antiphage defence systems of bacteria. *Nat.*  
491 *Rev. Microbiol.* **21**, 686-700, doi:10.1038/s41579-023-00934-x (2023).
- 492 45 Maffei, E. *et al.* Systematic exploration of *Escherichia coli* phage-host interactions with the  
493 BASEL phage collection. *PLoS Biol.* **19**, e3001424, doi:10.1371/journal.pbio.3001424 (2021).
- 494
